# Supplementary material for: Ionization States, Cellular Toxicity and Molecular Modeling Studies of Midazolam Complexed with Trimethyl-β-Cyclodextrin
Source: MDPI journal article supplement (doi:10.3390/molecules191016861), 2014-10-21

## Supporting information

### Supplementary Material 3: Tables S1–S3, Figures S5–S7

**Table S1.** Molecular docking results from three different experiments for open-ring (OR) form of midazolam formulated with TRIMEB.

| Rank | Form | Pose | $\Delta G_{\text{bind}}$ | Pose | $\Delta G_{\text{bind}}$ | Pose | $\Delta G_{\text{bind}}$ |
|------|------|------|--------------------------|------|--------------------------|------|--------------------------|
| 1    | OR   | 1    | -5.590                   | 1    | -5.550                   | 1    | -5.570                   |
| 2    | OR   | 2    | -5.540                   | 2    | -5.140                   | 2    | -5.110                   |
| 3    | OR   | 3    | -5.360                   | 3    | -4.990                   | 3    | -4.960                   |
| 4    | OR   | 4    | -5.000                   | 4    | -4.950                   | 4    | -4.710                   |
| 5    | OR   | 5    | -4.940                   | 5    | -4.870                   | 5    | -4.600                   |
| 6    | OR   | 6    | -4.910                   | 6    | -4.780                   | 6    | -4.510                   |
| 7    | OR   | 7    | -4.810                   | 7    | -4.730                   | 7    | -4.390                   |
| 8    | OR   | 8    | -4.800                   | 8    | -4.620                   | 8    | -4.320                   |
| 9    | OR   | 9    | -4.590                   | 9    | -4.560                   | 9    | -4.310                   |
| 10   | OR   | 10   | -4.590                   | 10   | -4.460                   | 10   | -4.290                   |
| 11   | OR   | 11   | -4.510                   | 11   | -4.340                   | 11   | -4.250                   |
| 12   | OR   | 12   | -4.470                   | 12   | -4.260                   | 12   | -4.240                   |
| 13   | OR   | 13   | -4.470                   | 13   | -4.240                   | 13   | -4.220                   |
| 14   | OR   | 14   | -4.380                   | 14   | -4.230                   | 14   | -4.210                   |
| 15   | OR   | 15   | -4.310                   | 15   | -4.180                   | 15   | -4.160                   |
| 16   | OR   | 16   | -4.270                   | 16   | -4.170                   | 16   | -4.060                   |
| 17   | OR   | 18   | -4.250                   | 17   | -4.160                   | 17   | -4.010                   |
| 18   | OR   | 17   | -4.250                   | 18   | -4.120                   | 18   | -3.910                   |
| 19   | OR   | 19   | -4.240                   | 19   | -3.940                   | 19   | -3.890                   |
| 20   | OR   | 20   | -4.210                   | 20   | -3.920                   | 20   | -3.880                   |
| 21   | OR   | 21   | -4.180                   | 22   | -3.880                   | 21   | -3.820                   |
| 22   | OR   | 23   | -4.140                   | 21   | -3.880                   | 22   | -3.810                   |
| 23   | OR   | 22   | -4.140                   | 23   | -3.830                   | 23   | -3.770                   |
| 24   | OR   | 24   | -4.140                   | 24   | -3.620                   | 24   | -3.760                   |
| 25   | OR   | 25   | -4.130                   | 25   | -3.560                   | 25   | -3.700                   |
| 26   | OR   | 26   | -4.070                   | 26   | -3.530                   | 26   | -3.690                   |
| 27   | OR   | 27   | -4.040                   | 27   | -3.420                   | 27   | -3.680                   |
| 28   | OR   | 28   | -3.900                   | 28   | -3.340                   | 28   | -3.630                   |
| 29   | OR   | 29   | -3.880                   | 29   | -3.320                   | 29   | -3.620                   |
| 30   | OR   | 30   | -3.820                   | 30   | -3.310                   | 30   | -3.590                   |
| 31   | OR   | 31   | -3.790                   | 31   | -3.290                   | 31   | -3.550                   |
| 32   | OR   | 32   | -3.710                   | 32   | -3.290                   | 32   | -3.550                   |
| 33   | OR   | 33   | -3.680                   | 33   | -3.250                   | 33   | -3.540                   |
| 34   | OR   | 34   | -3.610                   | 34   | -3.240                   | 34   | -3.480                   |
| 35   | OR   | 35   | -3.570                   | 35   | -3.240                   | 35   | -3.470                   |
| 36   | OR   | 36   | -3.540                   | 36   | -3.240                   | 36   | -3.450                   |
| 37   | OR   | 37   | -3.450                   | 37   | -3.200                   | 37   | -3.440                   |
| 38   | OR   | 38   | -3.380                   | 38   | -3.180                   | 38   | -3.440                   |
| 39   | OR   | 39   | -3.380                   | 39   | -3.140                   | 39   | -3.430                   |
| 40   | OR   | 40   | -3.360                   | 40   | -3.130                   | 40   | -3.380                   |
| 41   | OR   | 41   | -3.250                   | 41   | -3.120                   | 41   | -3.330                   |
| 42   | OR   | 43   | -3.250                   | 42   | -3.080                   | 42   | -3.300                   |

Table S1. *Cont.*

| Rank | Form | Pose | $\Delta G_{\text{bind}}$ | Pose | $\Delta G_{\text{bind}}$ | Pose | $\Delta G_{\text{bind}}$ |
|------|------|------|--------------------------|------|--------------------------|------|--------------------------|
| 43   | OR   | 42   | -3.250                   | 44   | -3.070                   | 43   | -3.270                   |
| 44   | OR   | 44   | -3.240                   | 43   | -3.070                   | 44   | -3.260                   |
| 45   | OR   | 45   | -3.200                   | 45   | -3.060                   | 45   | -3.250                   |
| 46   | OR   | 46   | -3.150                   | 46   | -3.040                   | 46   | -3.240                   |
| 47   | OR   | 47   | -3.130                   | 47   | -3.020                   | 47   | -3.110                   |
| 48   | OR   | 48   | -3.110                   | 49   | -2.950                   | 48   | -3.110                   |
| 49   | OR   | 49   | -3.090                   | 48   | -2.950                   | 49   | -3.100                   |
| 50   | OR   | 50   | -3.050                   | 50   | -2.770                   | 50   | -3.080                   |
| 51   | OR   | 51   | -3.030                   | 51   | -2.690                   | 51   | -3.080                   |
| 52   | OR   | 52   | -3.010                   | 52   | -2.680                   | 52   | -3.070                   |
| 53   | OR   | 53   | -2.990                   | 53   | -2.630                   | 53   | -3.020                   |
| 54   | OR   | 54   | -2.960                   | 54   | -2.620                   | 56   | -2.990                   |
| 55   | OR   | 55   | -2.960                   | 56   | -2.560                   | 54   | -2.990                   |
| 56   | OR   | 56   | -2.950                   | 55   | -2.560                   | 55   | -2.990                   |
| 57   | OR   | 57   | -2.860                   | 57   | -2.550                   | 58   | -2.960                   |
| 58   | OR   | 58   | -2.830                   | 58   | -2.520                   | 57   | -2.960                   |
| 59   | OR   | 59   | -2.820                   | 61   | -2.510                   | 60   | -2.910                   |
| 60   | OR   | 60   | -2.800                   | 60   | -2.510                   | 59   | -2.910                   |
| 61   | OR   | 61   | -2.720                   | 59   | -2.510                   | 61   | -2.890                   |
| 62   | OR   | 62   | -2.710                   | 62   | -2.480                   | 62   | -2.850                   |
| 63   | OR   | 63   | -2.630                   | 64   | -2.380                   | 63   | -2.820                   |
| 64   | OR   | 66   | -2.590                   | 63   | -2.380                   | 64   | -2.780                   |
| 65   | OR   | 65   | -2.590                   | 65   | -2.330                   | 65   | -2.680                   |
| 66   | OR   | 64   | -2.590                   | 66   | -2.320                   | 66   | -2.670                   |
| 67   | OR   | 67   | -2.580                   | 67   | -2.310                   | 67   | -2.560                   |
| 68   | OR   | 69   | -2.570                   | 68   | -2.280                   | 68   | -2.550                   |
| 69   | OR   | 68   | -2.570                   | 69   | -2.240                   | 69   | -2.460                   |
| 70   | OR   | 70   | -2.550                   | 70   | -2.220                   | 70   | -2.400                   |
| 71   | OR   | 71   | -2.530                   | 71   | -2.210                   | 71   | -2.400                   |
| 72   | OR   | 72   | -2.510                   | 72   | -2.200                   | 72   | -2.380                   |
| 73   | OR   | 73   | -2.490                   | 73   | -2.200                   | 73   | -2.340                   |
| 74   | OR   | 74   | -2.480                   | 74   | -2.180                   | 74   | -2.260                   |
| 75   | OR   | 75   | -2.460                   | 75   | -2.140                   | 75   | -2.250                   |
| 76   | OR   | 76   | -2.450                   | 76   | -2.130                   | 76   | -2.220                   |
| 77   | OR   | 78   | -2.420                   | 77   | -2.130                   | 77   | -2.160                   |
| 78   | OR   | 77   | -2.420                   | 78   | -2.090                   | 78   | -2.130                   |
| 79   | OR   | 79   | -2.410                   | 79   | -2.070                   | 79   | -2.130                   |
| 80   | OR   | 80   | -2.370                   | 80   | -2.060                   | 80   | -2.080                   |
| 81   | OR   | 81   | -2.360                   | 81   | -2.050                   | 81   | -2.050                   |
| 82   | OR   | 82   | -2.330                   | 82   | -2.010                   | 82   | -2.030                   |
| 83   | OR   | 83   | -2.300                   | 83   | -2.000                   | 83   | -1.970                   |
| 84   | OR   | 84   | -2.250                   | 84   | -2.000                   | 85   | -1.950                   |
| 85   | OR   | 85   | -2.220                   | 85   | -1.940                   | 84   | -1.950                   |
| 86   | OR   | 86   | -2.160                   | 86   | -1.940                   | 86   | -1.920                   |
| 87   | OR   | 87   | -2.130                   | 87   | -1.910                   | 87   | -1.860                   |

Table S1. *Cont.*

| Rank | Form | Pose | $\Delta G_{\text{bind}}$ | Pose | $\Delta G_{\text{bind}}$ | Pose | $\Delta G_{\text{bind}}$ |
|------|------|------|--------------------------|------|--------------------------|------|--------------------------|
| 88   | OR   | 88   | -2.040                   | 89   | -1.880                   | 88   | -1.850                   |
| 89   | OR   | 89   | -2.030                   | 88   | -1.880                   | 90   | -1.820                   |
| 90   | OR   | 90   | -2.010                   | 90   | -1.790                   | 89   | -1.820                   |
| 91   | OR   | 92   | -1.850                   | 91   | -1.780                   | 91   | -1.810                   |
| 92   | OR   | 91   | -1.850                   | 92   | -1.770                   | 92   | -1.790                   |
| 93   | OR   | 93   | -1.800                   | 93   | -1.760                   | 93   | -1.780                   |
| 94   | OR   | 94   | -1.540                   | 94   | -1.610                   | 94   | -1.660                   |
| 95   | OR   | 95   | -1.500                   | 95   | -1.490                   | 95   | -1.640                   |
| 96   | OR   | 96   | -1.500                   | 96   | -1.450                   | 96   | -1.430                   |
| 97   | OR   | 97   | -1.370                   | 97   | -1.420                   | 97   | -1.350                   |
| 98   | OR   | 98   | -1.340                   | 98   | -1.350                   | 98   | -1.100                   |
| 99   | OR   | 99   | -1.070                   | 99   | -1.230                   | 99   | -0.95                    |
| 100  | OR   | 100  | -0.2                     | 100  | -0.7                     | 100  | -0.34                    |

**Figure S5.** Histograms of clustered binding conformations for open-ring (OR) form of midazolam formulated with TRIMEB. The conformational clustering was performed for three different molecular docking experiments (A–C) using a root-mean-square-deviation cut-off value of 2.0 Å.

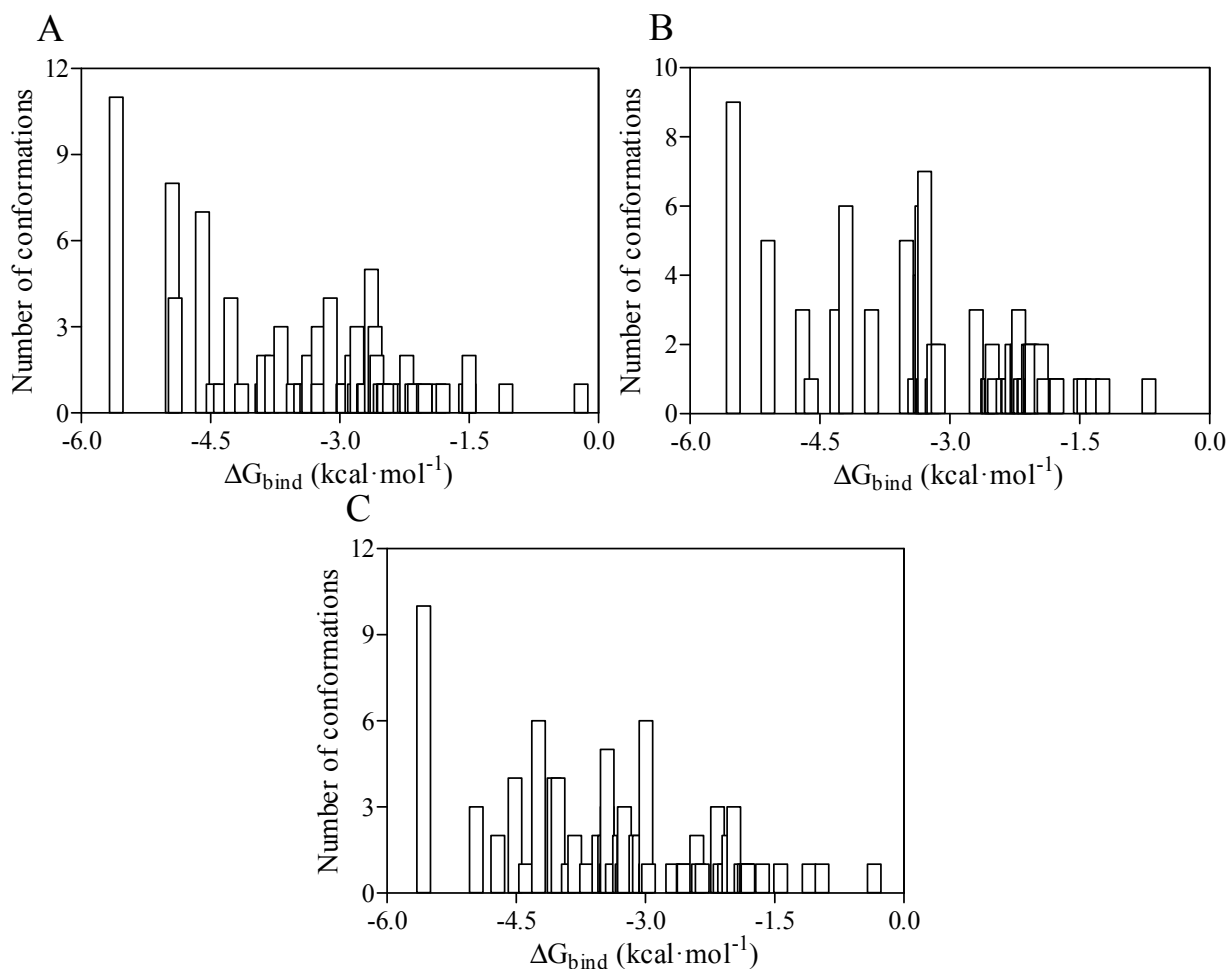

**Table S2.** Molecular docking results from three different experiments for transition state (TS) form of midazolam formulated with TRIMEB.

| Rank | Form | Pose | $\Delta G_{\text{bind}}$ | Pose | $\Delta G_{\text{bind}}$ | Pose | $\Delta G_{\text{bind}}$ |
|------|------|------|--------------------------|------|--------------------------|------|--------------------------|
| 1    | TS   | 12   | -5.150                   | 12   | -5.150                   | 12   | -5.150                   |
| 2    | TS   | 13   | -5.150                   | 13   | -5.150                   | 13   | -5.150                   |
| 3    | TS   | 10   | -5.150                   | 10   | -5.150                   | 10   | -5.150                   |
| 4    | TS   | 11   | -5.150                   | 11   | -5.150                   | 11   | -5.150                   |
| 5    | TS   | 16   | -5.150                   | 16   | -5.150                   | 16   | -5.150                   |
| 6    | TS   | 17   | -5.150                   | 17   | -5.150                   | 17   | -5.150                   |
| 7    | TS   | 14   | -5.150                   | 14   | -5.150                   | 14   | -5.150                   |
| 8    | TS   | 15   | -5.150                   | 15   | -5.150                   | 15   | -5.150                   |
| 9    | TS   | 18   | -5.150                   | 18   | -5.150                   | 18   | -5.150                   |
| 10   | TS   | 19   | -5.150                   | 19   | -5.150                   | 19   | -5.150                   |
| 11   | TS   | 8    | -5.150                   | 24   | -5.150                   | 8    | -5.150                   |
| 12   | TS   | 9    | -5.150                   | 25   | -5.150                   | 9    | -5.150                   |
| 13   | TS   | 1    | -5.150                   | 8    | -5.150                   | 1    | -5.150                   |
| 14   | TS   | 2    | -5.150                   | 9    | -5.150                   | 2    | -5.150                   |
| 15   | TS   | 3    | -5.150                   | 1    | -5.150                   | 3    | -5.150                   |
| 16   | TS   | 4    | -5.150                   | 2    | -5.150                   | 4    | -5.150                   |
| 17   | TS   | 5    | -5.150                   | 3    | -5.150                   | 5    | -5.150                   |
| 18   | TS   | 6    | -5.150                   | 4    | -5.150                   | 6    | -5.150                   |
| 19   | TS   | 7    | -5.150                   | 5    | -5.150                   | 7    | -5.150                   |
| 20   | TS   | 21   | -5.150                   | 6    | -5.150                   | 22   | -5.150                   |
| 21   | TS   | 20   | -5.150                   | 7    | -5.150                   | 21   | -5.150                   |
| 22   | TS   | 24   | -5.140                   | 23   | -5.150                   | 20   | -5.150                   |
| 23   | TS   | 25   | -5.140                   | 22   | -5.150                   | 24   | -5.140                   |
| 24   | TS   | 23   | -5.140                   | 21   | -5.150                   | 25   | -5.140                   |
| 25   | TS   | 22   | -5.140                   | 20   | -5.150                   | 28   | -5.140                   |
| 26   | TS   | 26   | -5.140                   | 28   | -5.140                   | 30   | -5.140                   |
| 27   | TS   | 28   | -5.130                   | 30   | -5.140                   | 31   | -5.140                   |
| 28   | TS   | 27   | -5.130                   | 31   | -5.140                   | 32   | -5.140                   |
| 29   | TS   | 29   | -5.100                   | 29   | -5.140                   | 29   | -5.140                   |
| 30   | TS   | 30   | -4.980                   | 27   | -5.140                   | 23   | -5.140                   |
| 31   | TS   | 31   | -4.140                   | 26   | -5.140                   | 27   | -5.140                   |
| 32   | TS   | 32   | -4.120                   | 32   | -5.130                   | 26   | -5.140                   |
| 33   | TS   | 33   | -4.100                   | 34   | -5.120                   | 34   | -5.130                   |
| 34   | TS   | 38   | -4.090                   | 33   | -5.120                   | 35   | -5.130                   |
| 35   | TS   | 39   | -4.090                   | 35   | -5.110                   | 33   | -5.130                   |
| 36   | TS   | 34   | -4.090                   | 36   | -5.090                   | 36   | -5.110                   |
| 37   | TS   | 35   | -4.090                   | 37   | -4.950                   | 37   | -4.890                   |
| 38   | TS   | 36   | -4.090                   | 38   | -4.910                   | 38   | -4.860                   |
| 39   | TS   | 37   | -4.090                   | 39   | -4.330                   | 39   | -4.190                   |
| 40   | TS   | 49   | -4.080                   | 40   | -4.320                   | 41   | -4.100                   |
| 41   | TS   | 48   | -4.080                   | 41   | -4.280                   | 40   | -4.100                   |
| 42   | TS   | 45   | -4.080                   | 42   | -4.230                   | 45   | -4.090                   |
| 43   | TS   | 44   | -4.080                   | 43   | -4.140                   | 44   | -4.090                   |

Table S2. *Cont.*

| Rank | Form | Pose | $\Delta G_{\text{bind}}$ | Pose | $\Delta G_{\text{bind}}$ | Pose | $\Delta G_{\text{bind}}$ |
|------|------|------|--------------------------|------|--------------------------|------|--------------------------|
| 44   | TS   | 47   | -4.080                   | 44   | -4.100                   | 47   | -4.090                   |
| 45   | TS   | 46   | -4.080                   | 49   | -4.090                   | 46   | -4.090                   |
| 46   | TS   | 41   | -4.080                   | 48   | -4.090                   | 43   | -4.090                   |
| 47   | TS   | 40   | -4.080                   | 45   | -4.090                   | 42   | -4.090                   |
| 48   | TS   | 43   | -4.080                   | 47   | -4.090                   | 49   | -4.080                   |
| 49   | TS   | 42   | -4.080                   | 46   | -4.090                   | 48   | -4.080                   |
| 50   | TS   | 52   | -4.080                   | 50   | -4.090                   | 54   | -4.080                   |
| 51   | TS   | 53   | -4.080                   | 56   | -4.080                   | 52   | -4.080                   |
| 52   | TS   | 50   | -4.080                   | 57   | -4.080                   | 53   | -4.080                   |
| 53   | TS   | 51   | -4.080                   | 54   | -4.080                   | 50   | -4.080                   |
| 54   | TS   | 70   | -4.070                   | 55   | -4.080                   | 51   | -4.080                   |
| 55   | TS   | 71   | -4.070                   | 52   | -4.080                   | 78   | -4.070                   |
| 56   | TS   | 58   | -4.070                   | 53   | -4.080                   | 70   | -4.070                   |
| 57   | TS   | 59   | -4.070                   | 51   | -4.080                   | 71   | -4.070                   |
| 58   | TS   | 56   | -4.070                   | 70   | -4.070                   | 72   | -4.070                   |
| 59   | TS   | 57   | -4.070                   | 71   | -4.070                   | 73   | -4.070                   |
| 60   | TS   | 54   | -4.070                   | 72   | -4.070                   | 74   | -4.070                   |
| 61   | TS   | 55   | -4.070                   | 73   | -4.070                   | 75   | -4.070                   |
| 62   | TS   | 67   | -4.070                   | 58   | -4.070                   | 76   | -4.070                   |
| 63   | TS   | 66   | -4.070                   | 59   | -4.070                   | 77   | -4.070                   |
| 64   | TS   | 65   | -4.070                   | 67   | -4.070                   | 58   | -4.070                   |
| 65   | TS   | 64   | -4.070                   | 66   | -4.070                   | 59   | -4.070                   |
| 66   | TS   | 63   | -4.070                   | 65   | -4.070                   | 56   | -4.070                   |
| 67   | TS   | 62   | -4.070                   | 64   | -4.070                   | 57   | -4.070                   |
| 68   | TS   | 61   | -4.070                   | 63   | -4.070                   | 55   | -4.070                   |
| 69   | TS   | 60   | -4.070                   | 62   | -4.070                   | 67   | -4.070                   |
| 70   | TS   | 69   | -4.070                   | 61   | -4.070                   | 66   | -4.070                   |
| 71   | TS   | 68   | -4.070                   | 60   | -4.070                   | 65   | -4.070                   |
| 72   | TS   | 72   | -4.060                   | 69   | -4.070                   | 64   | -4.070                   |
| 73   | TS   | 73   | -4.060                   | 68   | -4.070                   | 63   | -4.070                   |
| 74   | TS   | 74   | -4.060                   | 74   | -4.060                   | 62   | -4.070                   |
| 75   | TS   | 75   | -4.040                   | 75   | -4.060                   | 61   | -4.070                   |
| 76   | TS   | 76   | -4.030                   | 76   | -3.830                   | 60   | -4.070                   |
| 77   | TS   | 77   | -4.010                   | 77   | -3.720                   | 69   | -4.070                   |
| 78   | TS   | 78   | -3.990                   | 78   | -3.610                   | 68   | -4.070                   |
| 79   | TS   | 79   | -3.980                   | 79   | -3.600                   | 81   | -4.060                   |
| 80   | TS   | 80   | -3.900                   | 80   | -3.580                   | 80   | -4.060                   |
| 81   | TS   | 81   | -3.870                   | 81   | -3.420                   | 79   | -4.060                   |
| 82   | TS   | 82   | -3.740                   | 82   | -3.390                   | 83   | -4.040                   |
| 83   | TS   | 83   | -3.680                   | 83   | -3.370                   | 82   | -4.040                   |
| 84   | TS   | 84   | -3.670                   | 84   | -3.370                   | 84   | -3.880                   |
| 85   | TS   | 85   | -3.660                   | 85   | -3.260                   | 85   | -3.640                   |
| 86   | TS   | 86   | -3.630                   | 87   | -3.230                   | 86   | -3.610                   |
| 87   | TS   | 87   | -3.440                   | 86   | -3.230                   | 88   | -3.590                   |
| 88   | TS   | 88   | -3.300                   | 88   | -3.220                   | 87   | -3.590                   |

Table S2. *Cont.*

| Rank | Form | Pose | $\Delta G_{\text{bind}}$ | Pose | $\Delta G_{\text{bind}}$ | Pose | $\Delta G_{\text{bind}}$ |
|------|------|------|--------------------------|------|--------------------------|------|--------------------------|
| 89   | TS   | 89   | -3.220                   | 89   | -3.210                   | 89   | -3.450                   |
| 90   | TS   | 92   | -3.210                   | 90   | -3.210                   | 90   | -3.390                   |
| 91   | TS   | 90   | -3.210                   | 92   | -3.200                   | 91   | -3.360                   |
| 92   | TS   | 91   | -3.210                   | 91   | -3.200                   | 92   | -3.250                   |
| 93   | TS   | 93   | -3.200                   | 93   | -3.190                   | 93   | -3.210                   |
| 94   | TS   | 94   | -3.190                   | 94   | -3.190                   | 94   | -3.200                   |
| 95   | TS   | 95   | -3.180                   | 95   | -3.190                   | 95   | -3.190                   |
| 96   | TS   | 96   | -3.170                   | 96   | -3.090                   | 96   | -3.180                   |
| 97   | TS   | 97   | -3.170                   | 97   | -3.080                   | 97   | -3.170                   |
| 98   | TS   | 98   | -3.160                   | 98   | -3.000                   | 98   | -3.080                   |
| 99   | TS   | 99   | -3.120                   | 99   | -3.000                   | 99   | -3.000                   |
| 100  | TS   | 100  | -3.040                   | 100  | -2.990                   | 100  | -2.460                   |

**Figure S6.** Histograms of clustered binding conformations for transition state (TS) form of midazolam formulated with TRIMEB. The conformational clustering was performed for three different molecular docking experiments (A–C) using a root-mean-square-deviation cut-off value of 2.0 Å.

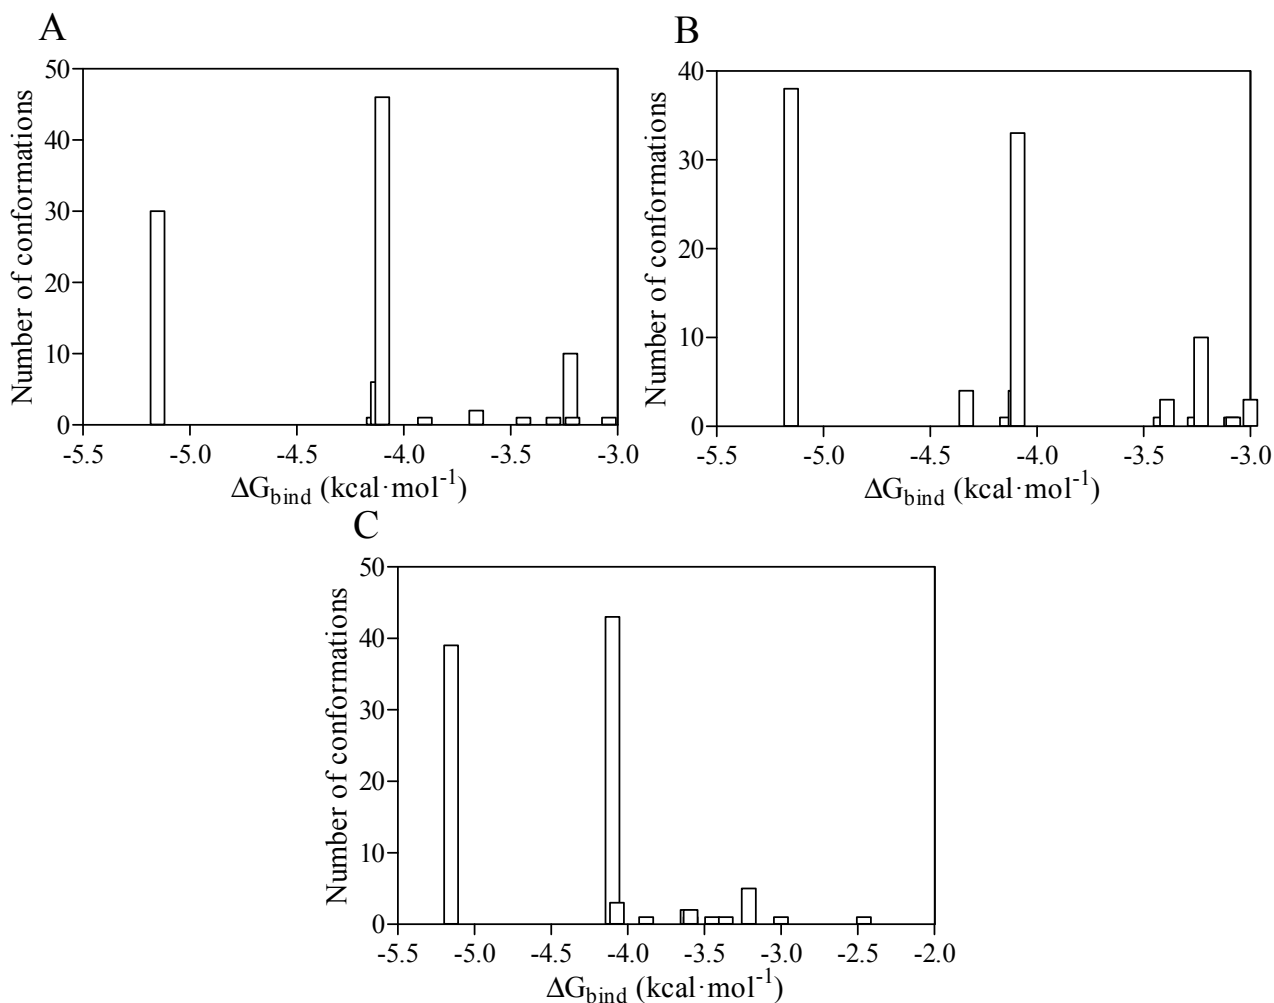

**Table S3.** Molecular docking results from three different experiments for closed-ring (CR) form of midazolam formulated with TRIMEB.

| Rank | Form | Pose | $\Delta G_{\text{bind}}$ | Pose | $\Delta G_{\text{bind}}$ | Pose | $\Delta G_{\text{bind}}$ |
|------|------|------|--------------------------|------|--------------------------|------|--------------------------|
| 1    | CR   | 3    | -5.150                   | 3    | -4.410                   | 12   | -4.410                   |
| 2    | CR   | 2    | -5.150                   | 2    | -4.410                   | 11   | -4.410                   |
| 3    | CR   | 1    | -5.150                   | 1    | -4.410                   | 10   | -4.410                   |
| 4    | CR   | 13   | -5.140                   | 7    | -4.410                   | 3    | -4.410                   |
| 5    | CR   | 12   | -5.140                   | 6    | -4.410                   | 2    | -4.410                   |
| 6    | CR   | 11   | -5.140                   | 5    | -4.410                   | 1    | -4.410                   |
| 7    | CR   | 10   | -5.140                   | 4    | -4.410                   | 7    | -4.410                   |
| 8    | CR   | 7    | -5.140                   | 9    | -4.410                   | 6    | -4.410                   |
| 9    | CR   | 6    | -5.140                   | 8    | -4.410                   | 5    | -4.410                   |
| 10   | CR   | 5    | -5.140                   | 17   | -4.400                   | 4    | -4.410                   |
| 11   | CR   | 4    | -5.140                   | 16   | -4.400                   | 9    | -4.410                   |
| 12   | CR   | 9    | -5.140                   | 15   | -4.400                   | 8    | -4.410                   |
| 13   | CR   | 8    | -5.140                   | 14   | -4.400                   | 17   | -4.400                   |
| 14   | CR   | 17   | -5.130                   | 13   | -4.400                   | 16   | -4.400                   |
| 15   | CR   | 16   | -5.130                   | 12   | -4.400                   | 15   | -4.400                   |
| 16   | CR   | 15   | -5.130                   | 11   | -4.400                   | 14   | -4.400                   |
| 17   | CR   | 14   | -5.130                   | 10   | -4.400                   | 13   | -4.400                   |
| 18   | CR   | 19   | -5.130                   | 19   | -4.400                   | 19   | -4.400                   |
| 19   | CR   | 18   | -5.130                   | 18   | -4.400                   | 18   | -4.400                   |
| 20   | CR   | 20   | -5.130                   | 20   | -4.400                   | 20   | -4.400                   |
| 21   | CR   | 24   | -5.120                   | 24   | -4.390                   | 21   | -4.400                   |
| 22   | CR   | 25   | -5.120                   | 25   | -4.390                   | 24   | -4.390                   |
| 23   | CR   | 22   | -5.120                   | 22   | -4.390                   | 25   | -4.390                   |
| 24   | CR   | 23   | -5.120                   | 23   | -4.390                   | 28   | -4.390                   |
| 25   | CR   | 21   | -5.120                   | 21   | -4.390                   | 22   | -4.390                   |
| 26   | CR   | 26   | -5.120                   | 26   | -4.380                   | 23   | -4.390                   |
| 27   | CR   | 28   | -5.110                   | 27   | -4.380                   | 26   | -4.390                   |
| 28   | CR   | 27   | -5.110                   | 28   | -4.370                   | 27   | -4.390                   |
| 29   | CR   | 29   | -5.110                   | 30   | -4.370                   | 31   | -4.380                   |
| 30   | CR   | 31   | -5.100                   | 29   | -4.370                   | 30   | -4.380                   |
| 31   | CR   | 30   | -5.100                   | 35   | -4.360                   | 32   | -4.380                   |
| 32   | CR   | 32   | -5.070                   | 31   | -4.360                   | 29   | -4.380                   |
| 33   | CR   | 33   | -5.050                   | 33   | -4.360                   | 33   | -4.370                   |
| 34   | CR   | 34   | -5.040                   | 32   | -4.360                   | 35   | -4.360                   |
| 35   | CR   | 36   | -4.990                   | 34   | -4.360                   | 34   | -4.360                   |
| 36   | CR   | 35   | -4.990                   | 36   | -4.340                   | 36   | -4.350                   |
| 37   | CR   | 37   | -4.990                   | 37   | -4.340                   | 37   | -4.350                   |
| 38   | CR   | 38   | -4.990                   | 38   | -4.340                   | 38   | -4.350                   |
| 39   | CR   | 39   | -4.950                   | 39   | -4.330                   | 39   | -4.350                   |
| 40   | CR   | 53   | -4.930                   | 40   | -4.330                   | 40   | -4.350                   |
| 41   | CR   | 52   | -4.930                   | 41   | -4.330                   | 44   | -4.340                   |
| 42   | CR   | 51   | -4.930                   | 42   | -4.330                   | 45   | -4.340                   |
| 43   | CR   | 50   | -4.930                   | 43   | -4.330                   | 46   | -4.340                   |

Table S3. *Cont.*

| Rank | Form | Pose | $\Delta G_{\text{bind}}$ | Pose | $\Delta G_{\text{bind}}$ | Pose | $\Delta G_{\text{bind}}$ |
|------|------|------|--------------------------|------|--------------------------|------|--------------------------|
| 44   | CR   | 55   | -4.930                   | 44   | -4.320                   | 41   | -4.340                   |
| 45   | CR   | 54   | -4.930                   | 45   | -4.320                   | 42   | -4.340                   |
| 46   | CR   | 44   | -4.930                   | 46   | -4.320                   | 43   | -4.340                   |
| 47   | CR   | 45   | -4.930                   | 47   | -4.320                   | 52   | -4.330                   |
| 48   | CR   | 46   | -4.930                   | 48   | -4.320                   | 51   | -4.330                   |
| 49   | CR   | 47   | -4.930                   | 51   | -4.310                   | 50   | -4.330                   |
| 50   | CR   | 40   | -4.930                   | 50   | -4.310                   | 47   | -4.330                   |
| 51   | CR   | 41   | -4.930                   | 49   | -4.310                   | 48   | -4.330                   |
| 52   | CR   | 42   | -4.930                   | 53   | -4.300                   | 49   | -4.330                   |
| 53   | CR   | 43   | -4.930                   | 52   | -4.300                   | 53   | -4.320                   |
| 54   | CR   | 48   | -4.930                   | 57   | -4.300                   | 56   | -4.320                   |
| 55   | CR   | 49   | -4.930                   | 56   | -4.300                   | 55   | -4.320                   |
| 56   | CR   | 65   | -4.920                   | 55   | -4.300                   | 54   | -4.320                   |
| 57   | CR   | 57   | -4.920                   | 54   | -4.300                   | 57   | -4.310                   |
| 58   | CR   | 56   | -4.920                   | 58   | -4.300                   | 59   | -4.310                   |
| 59   | CR   | 59   | -4.920                   | 65   | -4.290                   | 58   | -4.310                   |
| 60   | CR   | 58   | -4.920                   | 59   | -4.290                   | 60   | -4.310                   |
| 61   | CR   | 92   | -4.920                   | 71   | -4.290                   | 65   | -4.300                   |
| 62   | CR   | 91   | -4.920                   | 70   | -4.290                   | 68   | -4.300                   |
| 63   | CR   | 90   | -4.920                   | 68   | -4.290                   | 66   | -4.300                   |
| 64   | CR   | 78   | -4.920                   | 69   | -4.290                   | 67   | -4.300                   |
| 65   | CR   | 79   | -4.920                   | 66   | -4.290                   | 64   | -4.300                   |
| 66   | CR   | 74   | -4.920                   | 67   | -4.290                   | 62   | -4.300                   |
| 67   | CR   | 77   | -4.920                   | 64   | -4.290                   | 63   | -4.300                   |
| 68   | CR   | 76   | -4.920                   | 62   | -4.290                   | 61   | -4.300                   |
| 69   | CR   | 71   | -4.920                   | 63   | -4.290                   | 74   | -4.290                   |
| 70   | CR   | 70   | -4.920                   | 60   | -4.290                   | 76   | -4.290                   |
| 71   | CR   | 73   | -4.920                   | 61   | -4.290                   | 71   | -4.290                   |
| 72   | CR   | 72   | -4.920                   | 78   | -4.280                   | 70   | -4.290                   |
| 73   | CR   | 80   | -4.920                   | 74   | -4.280                   | 73   | -4.290                   |
| 74   | CR   | 81   | -4.920                   | 77   | -4.280                   | 72   | -4.290                   |
| 75   | CR   | 82   | -4.920                   | 76   | -4.280                   | 69   | -4.290                   |
| 76   | CR   | 83   | -4.920                   | 73   | -4.280                   | 75   | -4.290                   |
| 77   | CR   | 84   | -4.920                   | 72   | -4.280                   | 78   | -4.280                   |
| 78   | CR   | 85   | -4.920                   | 75   | -4.280                   | 79   | -4.280                   |
| 79   | CR   | 86   | -4.920                   | 79   | -4.270                   | 77   | -4.280                   |
| 80   | CR   | 87   | -4.920                   | 80   | -4.270                   | 80   | -4.280                   |
| 81   | CR   | 88   | -4.920                   | 81   | -4.250                   | 81   | -4.280                   |
| 82   | CR   | 89   | -4.920                   | 82   | -4.240                   | 82   | -4.280                   |
| 83   | CR   | 68   | -4.920                   | 83   | -4.230                   | 83   | -4.280                   |
| 84   | CR   | 69   | -4.920                   | 84   | -4.230                   | 84   | -4.280                   |
| 85   | CR   | 66   | -4.920                   | 85   | -4.220                   | 85   | -4.280                   |
| 86   | CR   | 67   | -4.920                   | 86   | -4.220                   | 86   | -4.280                   |
| 87   | CR   | 64   | -4.920                   | 87   | -4.200                   | 87   | -4.270                   |
| 88   | CR   | 62   | -4.920                   | 88   | -3.940                   | 92   | -4.260                   |



Table S3. *Cont.*

| Rank | Form | Pose | $\Delta G_{\text{bind}}$ | Pose | $\Delta G_{\text{bind}}$ | Pose | $\Delta G_{\text{bind}}$ |
|------|------|------|--------------------------|------|--------------------------|------|--------------------------|
| 89   | CR   | 63   | -4.920                   | 89   | -3.630                   | 91   | -4.260                   |
| 90   | CR   | 60   | -4.920                   | 90   | -3.620                   | 90   | -4.260                   |
| 91   | CR   | 61   | -4.920                   | 91   | -3.590                   | 88   | -4.260                   |
| 92   | CR   | 75   | -4.920                   | 92   | -3.570                   | 89   | -4.260                   |
| 93   | CR   | 96   | -4.910                   | 93   | -3.460                   | 93   | -4.250                   |
| 94   | CR   | 93   | -4.910                   | 94   | -3.460                   | 94   | -4.250                   |
| 95   | CR   | 95   | -4.910                   | 95   | -3.450                   | 95   | -4.240                   |
| 96   | CR   | 94   | -4.910                   | 97   | -3.440                   | 96   | -4.090                   |
| 97   | CR   | 97   | -4.840                   | 96   | -3.440                   | 97   | -3.620                   |
| 98   | CR   | 98   | -4.770                   | 98   | -3.430                   | 98   | -3.450                   |
| 99   | CR   | 99   | -4.760                   | 99   | -3.390                   | 99   | -3.310                   |
| 100  | CR   | 100  | -4.720                   | 100  | -3.340                   | 100  | -2.980                   |

**Figure S7.** Histograms of clustered binding conformations for closed-ring (CR) form of midazolam formulated with TRIMEB. The conformational clustering was performed for three different molecular docking experiments (A–C) using a root-mean-square-deviation cut-off value of 2.0 Å.

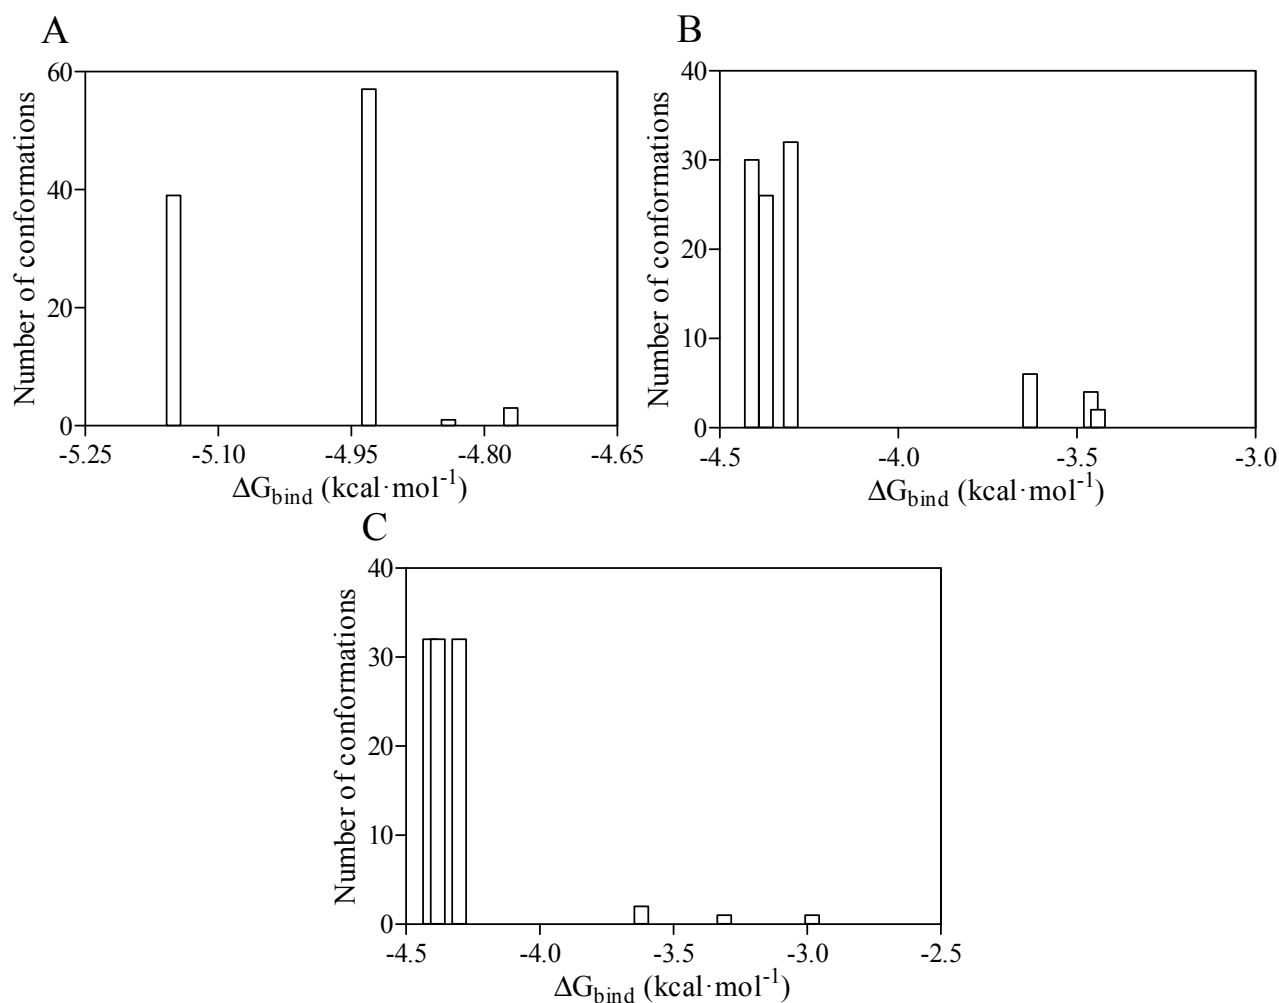

Supplement: s1 [file s1]
