# Supplementary material for: Ionization States, Cellular Toxicity and Molecular Modeling Studies of Midazolam Complexed with Trimethyl-β-Cyclodextrin
Source: MDPI journal article supplement (doi:10.3390/molecules191016861), 2014-10-21
Supplement: s1 [file s1]

## Supporting information

### Supplementary Material 2: Figures S3,S4

**Figure S3.** Mathematica script to determine net charge distribution for open-ring (OR) and closed-ring (CR) forms of midazolam and benzodiazepines according to Henderson-Hasselbalch equation.

$$y = ((-1. / ((10^{8.52 - x}) + 1)) + 1)$$
$$1 - \frac{1}{1 + 10^{8.52 - x}}$$

Show[%3, AxesLabel → {None, Nine}, FrameLabel → {{HoldForm[Charge], None}, {HoldForm[pH], None}}, PlotLabel → None, LabelStyle → {GrayLevel[0]}]

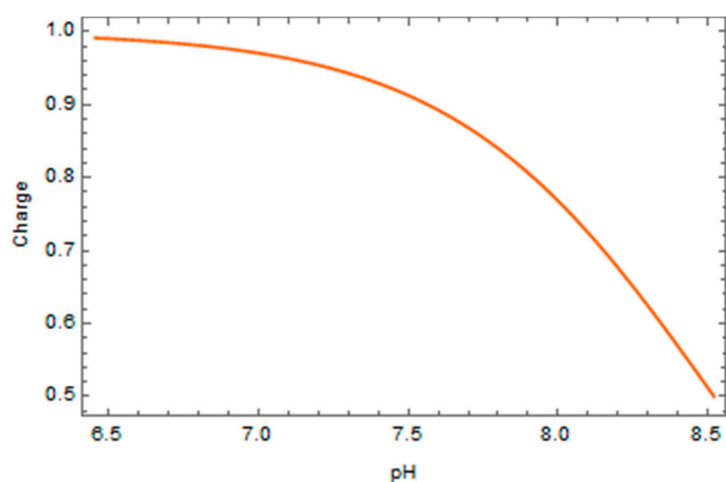

$$y = ((-1. / ((10^{3.48 - x}) + 1)) + 1)$$
$$1 - \frac{1}{1 + 10^{3.48 - x}}$$

Show[%13, AxesLabel → {None, Nine}, FrameLabel → {{HoldForm[Charge], None}, {HoldForm[pH], None}}, PlotLabel → None, LabelStyle → {GrayLevel[0]}]

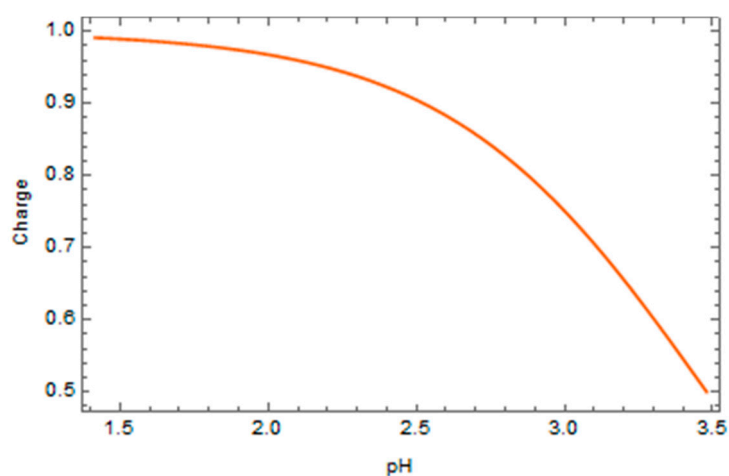

$$y = ((-1. / ((10^{7.0 - x}) + 1)) + 1)$$
$$1 - \frac{1}{1 + 10^{7.0 - x}}$$

Show[%18, AxesLabel → {None, Nine}, FrameLabel → {{HoldForm[Charge], None}, {HoldForm[pH], None}}, PlotLabel → None, LabelStyle → {GrayLevel[0]}]

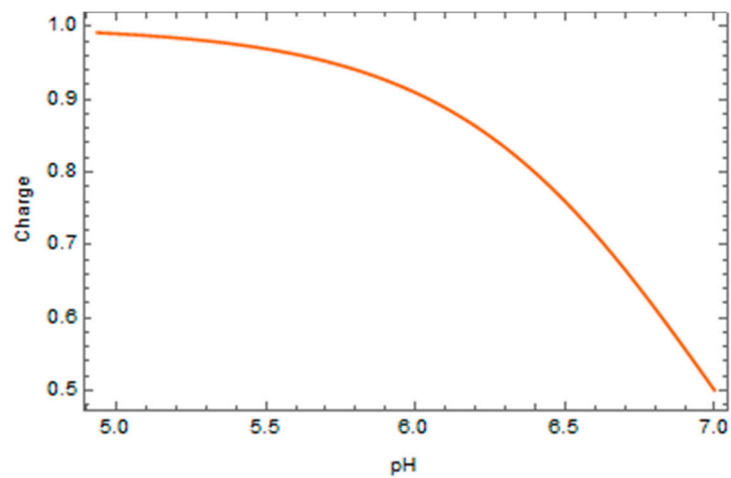

$$y = \left( \frac{-1.}{(10^{(2.4 - x)} + 1)} + 1 \right)$$

$$1 - \frac{1.}{1 + 10^{2.4-x}}$$

Show[%25, AxesLabel → {None, Nine}, FrameLabel → {{HoldForm[Charge], None}, {HoldForm[pH], None}}, PlotLabel → None, LabelStyle → {GrayLevel[0]}]

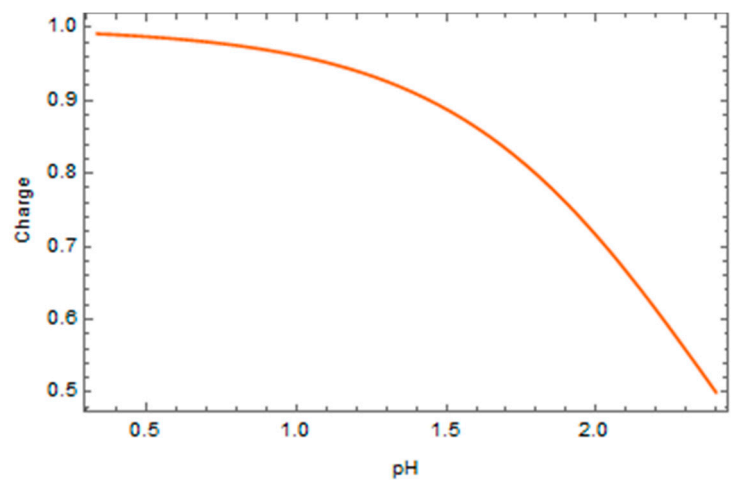

**Figure S4.** Mathematica script to determine net charge for open-ring (OR) and closed-ring (CR) forms of midazolam and benzodiazepines according to Henderson-Hasselbalch equation at physiological pH.

```
y = ((-1. / ((10 ^ (8.52 - 7.36)) + 1)) + 1)
0.935293
y = ((-1. / ((10 ^ (3.48 - 7.36)) + 1)) + 1)
0.000131808
y = ((-1. / ((10 ^ (7.0 - 7.36)) + 1)) + 1)
0.303871
y = ((-1. / ((10 ^ (2.4 - 7.36)) + 1)) + 1)
0.0000109647
```
